# Supplementary material for: Das Konfidenz- / Signifikanzniveau impliziert ein bestimmtes Kostenverhältnis zwischen Fehler 1. Art und Fehler 2. Art
Source: Atypon-hosted journal article supplement (doi:10.1026/0012-1924/a000329), 2024-03-14
Supplement: 0012-1924_a000329_esm1.pdf [file 0012-1924_a000329_esm1.pdf]

**Tabelle E1.** Übersicht des Literaturreviews

| Buchtitel                                       | Autor:innen<br>(Jahr)             | Diskussion von KIs,<br>HTs oder KDs im<br>Rahmen der<br>Einzelfalldiagnostik | Beispiele zur Einteilung des latenten<br>Kontinuums in definierte Abschnitte                                                                                                                                                                              | Eigener Abschnitt zur<br>statistischen<br>Entscheidungstheorie | Explizite Diskussion des<br>Zusammenhangs zwischen<br>Signifikanz- bzw.<br>Konfidenzniveaus und Kosten<br>von Fehlentscheidungen |
|-------------------------------------------------|-----------------------------------|------------------------------------------------------------------------------|-----------------------------------------------------------------------------------------------------------------------------------------------------------------------------------------------------------------------------------------------------------|----------------------------------------------------------------|----------------------------------------------------------------------------------------------------------------------------------|
| Psychologische<br>Diagnostik                    | Kubinger<br>(2019)                | ja                                                                           | Keine explizite Einteilung. Definition als<br>"auffällig," wenn KIs außerhalb der<br>mittleren 50% der Testwerte in der<br>Referenzpopulation, auch Nennung<br>anderer Kriterien wie +/- 1 SD, inkl.<br>Verweis auf die Willkürlichkeit solcher<br>Regeln | nein                                                           | nein                                                                                                                             |
| Testtheorie und<br>Fragebogenkon-<br>struktion  | Moosbrugger<br>& Kelava<br>(2020) | ja                                                                           | Keine explizite Einteilung, aber manchmal<br>Verwendung der Begriffe<br>"überdurchschnittlich" bzw.<br>"unterdurchschnittlich"                                                                                                                            | nein                                                           | nein                                                                                                                             |
| Grundlagen der<br>Psychologischen<br>Diagnostik | Ziegler &<br>Bühner (2012)        | ja                                                                           | "Unterdurchschnittlich" bis<br>"überdurchschnittlich," mit Definition des<br>Bereichs -1SD bis +1SD um den<br>Mittelwert als "Durchschnitt"                                                                                                               | nein                                                           | nein                                                                                                                             |
| Testtheorie und<br>Testkonstruktion             | Eid & Schmidt<br>(2014)           | ja                                                                           | Keine explizite Einteilung, aber manchmal<br>Verwendung der Begriffe<br>"überdurchschnittlich" bzw.<br>"unterdurchschnittlich"                                                                                                                            | nein                                                           | nein                                                                                                                             |

| Buchtitel                                                                            | Autor:innen<br>(Jahr)                            | Diskussion von KIs,<br>HTs oder KDs im<br>Rahmen der<br>Einzelfalldiagnostik | Beispiele zur Einteilung des latenten<br>Kontinuums in definierte Abschnitte                                                                                                                                                               | Eigener Abschnitt zur<br>statistischen<br>Entscheidungstheorie | Explizite Diskussion des<br>Zusammenhangs zwischen<br>Signifikanz- bzw.<br>Konfidenzniveaus und Kosten<br>von Fehlentscheidungen |
|--------------------------------------------------------------------------------------|--------------------------------------------------|------------------------------------------------------------------------------|--------------------------------------------------------------------------------------------------------------------------------------------------------------------------------------------------------------------------------------------|----------------------------------------------------------------|----------------------------------------------------------------------------------------------------------------------------------|
| Handbuch der<br>Psychologischen<br>Diagnostik                                        | Petermann &<br>Eid (2006)                        | ja                                                                           | Keine explizite Einteilung, aber manchmal<br>Verwendung der Begriffe<br>"überdurchschnittlich" bzw.<br>"unterdurchschnittlich"                                                                                                             | nein                                                           | nein                                                                                                                             |
| Psychologische<br>Diagnostik                                                         | André<br>Beauducel &<br>Anja Leue<br>(2014)      | ja                                                                           | "Unterdurchschnittlich" bis<br>"überdurchschnittlich," mit Definition des<br>Bereichs -1SD bis +1SD um den<br>Mittelwert als "Durchschnitt"                                                                                                | nein                                                           | nein                                                                                                                             |
| Psychologische<br>Diagnostik                                                         | Schmidt-<br>Atzert, Krumm<br>& Amelang<br>(2021) | ja                                                                           | Vorstellung verschiedener<br>Bereichssysteme (z. B. Marburger System,<br>Standardsystem), allerdings nur<br>Berücksichtigung des Punktwerts                                                                                                | nein                                                           | nein                                                                                                                             |
| Einführung in die<br>Test- und<br>Fragebogenkonstruktion                             | Bühner (2021)                                    | ja                                                                           | "Unterdurchschnittlich" bis<br>"überdurchschnittlich," mit Definition des<br>Bereichs -1SD bis +1SD um den<br>Mittelwert als "Durchschnitt"                                                                                                | nein                                                           | nein                                                                                                                             |
| Lehrbuch der<br>psychologischen<br>Diagnostik - Mit<br>Hinweisen zur<br>Intervention | Fisseni (2004)                                   | ja                                                                           | "Unterdurchschnittlich" bis<br>"überdurchschnittlich," mit<br>unterschiedlicher Definition des Bereichs<br>um den Mittelwert als "Durchschnitt" (z.<br>B. -1SD bis +1SD um den Mittelwert oder<br>-1 Quartil bis +1 Quartil um den Median) | nein (in 2. Auflage von<br>1997 ja)                            | nein                                                                                                                             |

| Buchtitel                                                                    | Autor:innen<br>(Jahr)                     | Diskussion von KIs,<br>HTs oder KDs im<br>Rahmen der<br>Einzelfalldiagnostik | Beispiele zur Einteilung des latenten<br>Kontinuums in definierte Abschnitte                                                                                                                                                                                                                                                | Eigener Abschnitt zur<br>statistischen<br>Entscheidungstheorie | Explizite Diskussion des<br>Zusammenhangs zwischen<br>Signifikanz- bzw.<br>Konfidenzniveaus und Kosten<br>von Fehlentscheidungen |
|------------------------------------------------------------------------------|-------------------------------------------|------------------------------------------------------------------------------|-----------------------------------------------------------------------------------------------------------------------------------------------------------------------------------------------------------------------------------------------------------------------------------------------------------------------------|----------------------------------------------------------------|----------------------------------------------------------------------------------------------------------------------------------|
| Lehrbuch<br>Psychologische<br>Diagnostik                                     | Stemmler &<br>Margraf-<br>Stiksrud (2015) | ja                                                                           | “Sehr niedrig” bis “sehr hoch,” Einteilung<br>nach dem Marburger System; zusätzlich<br>“unterdurchschnittlich” bis<br>“überdurchschnittlich,” mit Definition des<br>Bereichs -1SD bis +1SD um den<br>Mittelwert als “Durchschnitt”                                                                                          | nein                                                           | nein                                                                                                                             |
| Psychologische<br>Diagnostik in<br>Fallbeispielen                            | Ortner &<br>Kubinger<br>(2021)            | ja                                                                           | Je nach Anwendungsbeispiel verschieden,<br>z. B. “unterdurchschnittlich” bis<br>“überdurchschnittlich” mit Definition des<br>Bereichs -1SD bis +1SD um den<br>Mittelwert als “Durchschnitt” oder<br>“klinisch auffällig” ab einem Prozentrang<br>von 93 und “grenzwertig auffällig”<br>zwischen den Prozenträngen 84 und 92 | nein                                                           | nein                                                                                                                             |
| Psychologische<br>Diagnostik kompakt:<br>mit Arbeitsmaterial<br>zum Download | Schmitt &<br>Gerstenberg<br>(2014)        | ja (aber nicht in<br>Bezug zu<br>Einzelfalldiagnostik)                       | Keine Beispiele aus Einzelfalldiagnostik,<br>aber Definition von<br>“Entwicklungsstörung” bei Prozentrang<br>>95 oder <5 (je nach Merkmal)                                                                                                                                                                                  | nein                                                           | nein                                                                                                                             |
| Psychologische<br>Diagnostik:<br>Grundlagen und<br>Anwendungsfelder          | Krohne &<br>Hock (2015)                   | ja                                                                           | Keine explizite Einteilung, aber manchmal<br>Verwendung der Begriffe<br>“überdurchschnittlich” bzw. “(leicht)<br>unterdurchschnittlich”                                                                                                                                                                                     | ja                                                             | nein                                                                                                                             |

*Anmerkungen:* KI = Konfidenzintervall, HT = Hypothesentest, KD = Kritische Differenz, SD = Standardabweichung.
